# Supplementary material for: BigSeqKit: a parallel Big Data toolkit to process FASTA and FASTQ files at scale
Source: PubMed Central journal article supplement (PMC10388699; doi:10.1093/gigascience/giad062), 2023-07-31
Supplement: giad062_response_to_reviewer_comments_revision_1.pdf [file giad062_response_to_reviewer_comments_revision_1.pdf]

## Author's Response To Reviewer Comments

Close

We would like to thank again the reviewers and editors for their insightful comments and suggestions about the paper.

Close
